# Supplementary material for: Effect of the Sulfamethazine on Nitrogen Conversion in Alternate Wet and Dry Paddy Fields
Source: MDPI journal article supplement (doi:10.3390/agronomy12123034), 2022-11-30
Supplement: s1 [file s1]

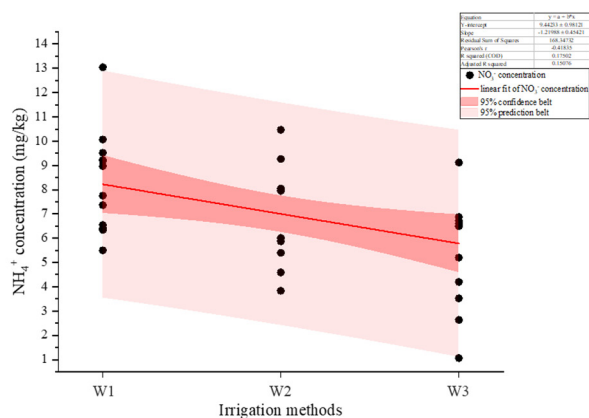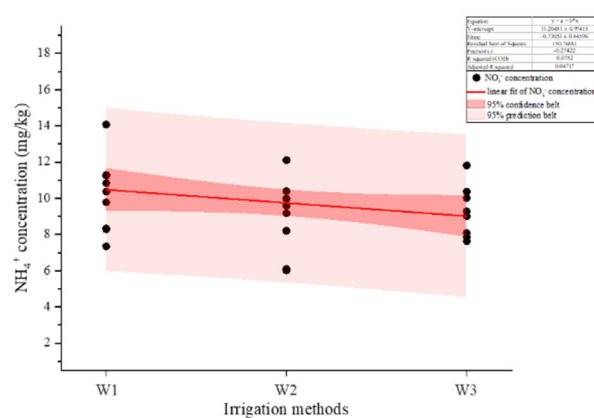

(a)  $\text{NH}_4^+$  concentration at the late tillering stage (b)  $\text{NH}_4^+$  concentration at the jointing-booting stage

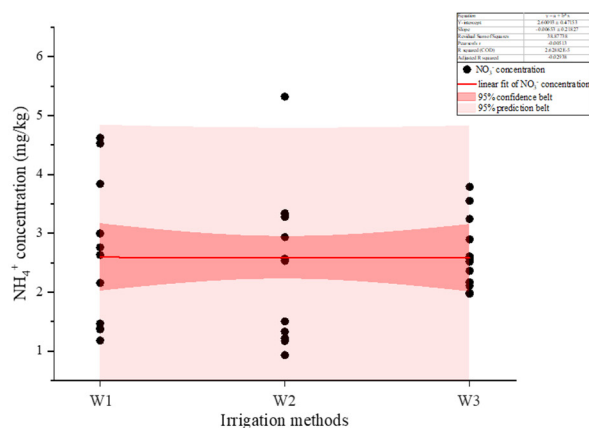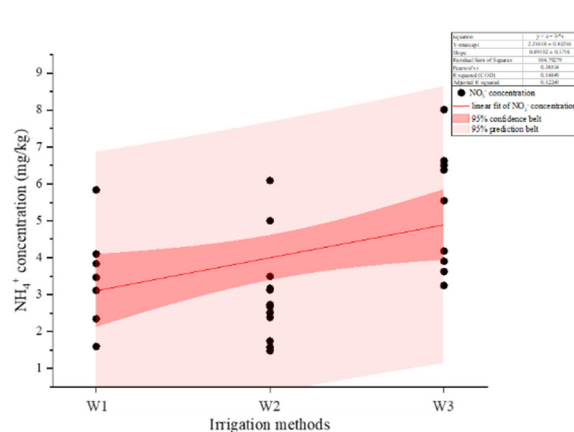

(c)  $\text{NH}_4^+$  concentration at the heading and flowering stage (d)  $\text{NH}_4^+$  concentration at the milk-ripe stage

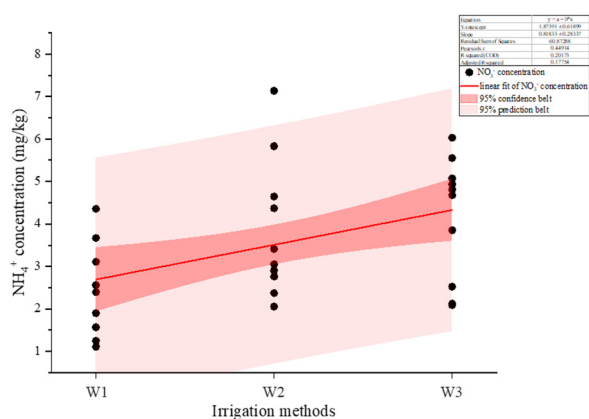

(e)  $\text{NH}_4^+$  concentration at the yellow ripening stage

Figure S1. Responses of  $\text{NH}_4^+$  concentration to irrigation methods at different growth stages.

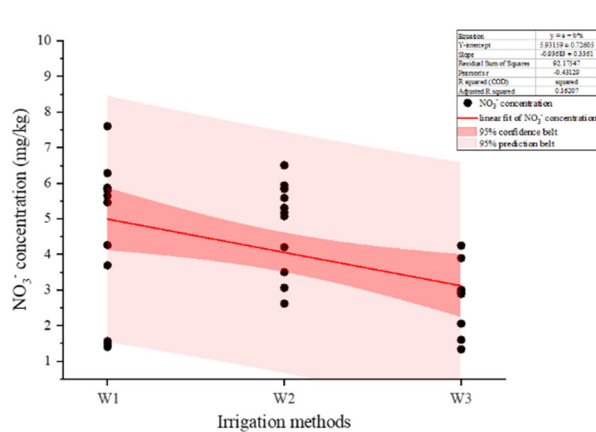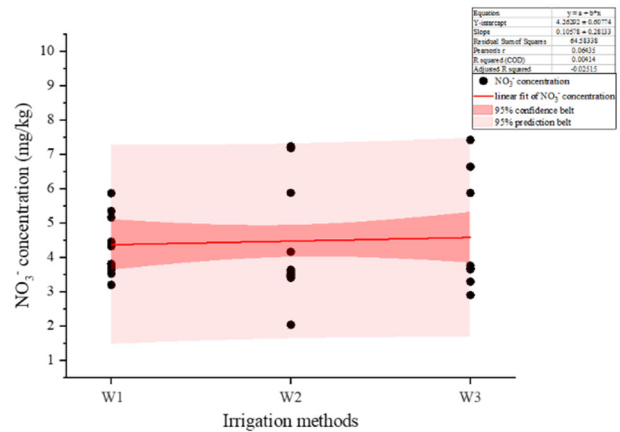

(a)  $\text{NO}_3^-$  concentration at the late tillering stage

(b)  $\text{NO}_3^-$  concentration at the jointing-booting stage

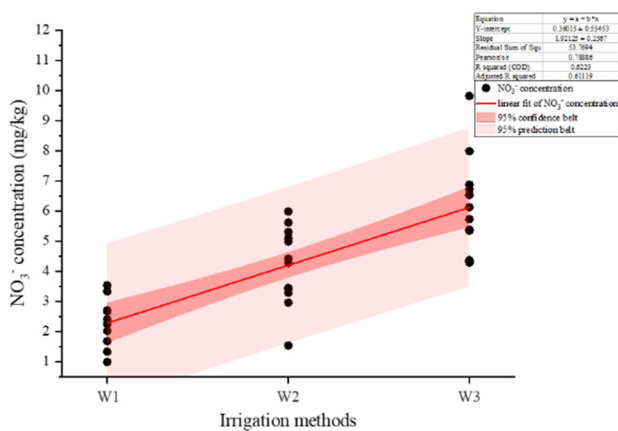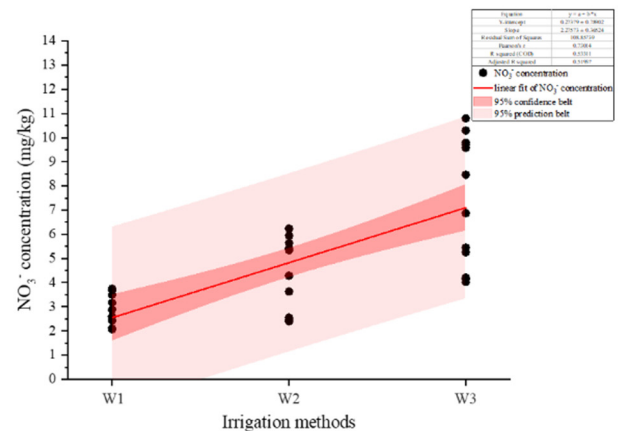

(c)  $\text{NO}_3^-$  concentration at the heading and flowering stage

(d)  $\text{NO}_3^-$  concentration at the milk-ripe stage

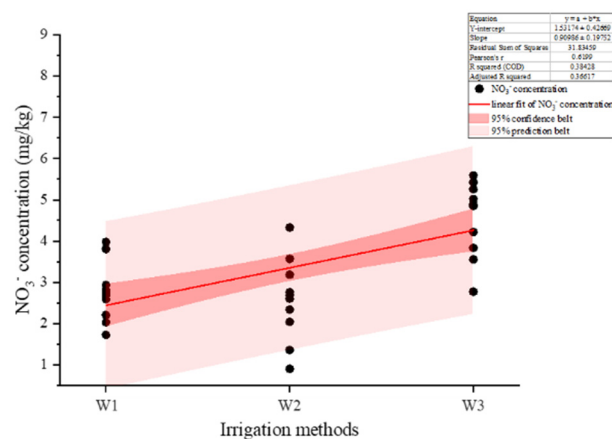

(e)  $\text{NO}_3^-$  concentration at the yellow ripening stage

Figure S2. Responses of  $\text{NO}_3^-$  concentration to irrigation methods at different growth stages.
