# Supplementary material for: Effect of the Sulfamethazine on Nitrogen Conversion in Alternate Wet and Dry Paddy Fields
Source: MDPI journal article supplement (doi:10.3390/agronomy12123034), 2022-11-30
Supplement: s1 [file s1]

Archive with 1 entries (1 files):
- agronomy-2020934-supplementary.pdf
